# Supplementary material for: Live cell imaging of X chromosome reactivation during somatic cell reprogramming
Source: PubMed Central journal article supplement — Biochem Biophys Rep. 2018 Jul 24;15:86–92. doi: 10.1016/j.bbrep.2018.07.007 (PMC6073053; doi:10.1016/j.bbrep.2018.07.007), 2018-07-24
Supplement: mmc2.pdf [file mmc2.pdf]

**Supplementary Table 1. Guide RNA sequences used in this study**

|       | Sequence (5' → 3')   | Locus in X chromosome |
|-------|----------------------|-----------------------|
| gRNA1 | CCGGGCCAGCGGGTATGCAG | <i>S</i> locus        |
| gRNA2 | GTCATGGGGTCCCATTACCG | <i>T</i> locus        |

**Supplementary Table 2. Location of the genomic regions used for the targeting vectors**

| Vector name         | Location (upstream of the fluorescent protein gene) | Location (downstream of the drug resistant gene) |
|---------------------|-----------------------------------------------------|--------------------------------------------------|
| phEF1-EGFP-IP-Syap1 | Chromosome X – NC_000086.7                          | Chromosome X – NC_000086.7                       |
| phEF1-hKO-IZ-Syap1  | 162853781 – 162856225 (2445bp)                      | 162851428 – 162853765 (2338bp)                   |
| phEF1-EGFP-IP-Taf1  | Chromosome X – NC_000086.7                          | Chromosome X – NC_000086.7                       |
| phEF1-hKO-IZ-Taf1   | 101625331 – 101626185 (855bp)                       | 101626196 – 101627027 (832bp)                    |

Syap1 gene: Chromosome X – NC\_000086.7 162856843-162888462 (complement)  
 Gm16459: Chromosome X – NC\_000086.7 162844870-162845523  
 Taf1 gene: Chromosome X – NC\_000086.7 101527572-101601789  
 Ogt: Chromosome X – NC\_000086.7 101640011-101684351

**Supplementary Table 3. Primer sets used in genomic PCR**

| Primer name | Sequence (5'→3')                      |
|-------------|---------------------------------------|
| a           | AGGTCTCATCACGTAGCTCTGTCTTGCAACTC      |
| b           | CGCCATCACTGCCAGCTATCTCCCAC            |
| c           | ACCTCCGCGCCCCGCAACCTCCCCTTCTAC        |
| d           | GAGTTCTGGACCGACCGGCTCGGGTTCTC         |
| e           | AGGCCCTCCGCCATCTTCTGAAGCTGAATC        |
| f           | TCTCGTTGGGGTCTTTGCTCAGGGC             |
| g           | GCCCTGAGCAAAGACCCCAACGAGA             |
| h           | GGTTTCGCCACCTCTGACTTGAGCGTC           |
| i           | AGGCCCTCCGCCATCTTCTGAAGCTGAATC        |
| j           | ATCTTCTTGGCGGCCTTGTAGGTGGTCTTGAAC     |
| k           | TGAGCGTGATCAAGCC                      |
| l           | GGTTTCGCCACCTCTGACTTGAGCGTC           |
| m           | CTAGAGCAAAGAAGACTGTGGGTCAGGTCCCCTC    |
| n           | CTCCCTCCTCTGTTTCTTAATGTCAGCTCATGCAG   |
| o           | ACCTCCGCGCCCCGCAACCTCCCCTTCTAC        |
| p           | ATCTTCTTGGCGGCCTTGTAGGTGGTCTTGAAC     |
| q           | CCAAACTCATCAATGTATCTTATCATGTCTGGATCTG |
| r           | TCTCGTTGGGGTCTTTGCTCAGGGC             |
| s           | GCCCTGAGCAAAGACCCCAACGAGA             |
| t           | GGTTTCGCCACCTCTGACTTGAGCGTC           |

|   |                                     |
|---|-------------------------------------|
| u | TGTCCAAACTCATCAATGTATCTTATCATGTCTGG |
| v | ATCTTCTTGGCGGCCTTGTAGGTGGTCTTGAAC   |
| w | TGAGCGTGATCAAGCC                    |
| x | GGTTTCGCCACCTCTGACTTGAGCGTC         |

**Supplementary Table 4. Primer sets used in real-time PCR**

| gene name        |         | Sequence (5'→3')            |
|------------------|---------|-----------------------------|
| <i>γ-tubulin</i> | Forward | CGGACCTGTCGCCAGTTT          |
|                  | Reverse | TGCGGAACTGCTCCATGA          |
| <i>Cdh1</i>      | Forward | ACGTCCCCCTTTACTGCTG         |
|                  | Reverse | TATCCGCGAGCTTGAGATG         |
| <i>Cdh2</i>      | Forward | ATCAACCCCATCTCAGGACA        |
|                  | Reverse | CAATGTCAATGGGGTTCTCC        |
| <i>Oct4</i>      | Forward | CTGTTCCCGTCACTGCTCTG        |
|                  | Reverse | AACCCCAAAGCTCCAGGTTC        |
| <i>Nanog</i>     | Forward | ACCTGAGCTATAAGCAGGTTAAGAC   |
|                  | Reverse | GTGCTGAGCCCTTCTGAATCAGAC    |
| <i>Tgfb1</i>     | Forward | TGAGTGGCTGTCTTTTGACG        |
|                  | Reverse | GGCTGATCCCGTTGATTTC         |
| <i>Thy1</i>      | Forward | TCGCTCTCCTGCTCTCAGTC        |
|                  | Reverse | TTATTCTCATGGCGGCAGTC        |
| <i>Fbxo15</i>    | Forward | CTCATCTGTACGAAGCAGC         |
|                  | Reverse | AGGTCACCGCATCCAAGTAA        |
| <i>Esrrb</i>     | Forward | TGGCAGGCAAGGATGACAGA        |
|                  | Reverse | TTACATGAGGGCCGTGGGA         |
| <i>Rex1</i>      | Forward | TTGATGGCTGCGAGAAGAG         |
|                  | Reverse | ACCCAGCCTGAGGACAATC         |
| <i>Sox2</i>      | Forward | AGAGAAGTTTGGAGCCCGAG        |
|                  | Reverse | ATCTGGCGGAGAATAGTTGG        |
| <i>Xist</i>      | Forward | GGTTCTCTCTCCAGAAGCTAGGAAAG  |
|                  | Reverse | TGGTAGATGGCATTGTGTATTATATGG |
